# Supplementary material for: Anaerobic Degradation of Non-Methane Alkanes by “Candidatus Methanoliparia” in Hydrocarbon Seeps of the Gulf of Mexico
Source: PubMed Central journal article supplement (PMC6703427; doi:10.1128/mbio.01814-19), 2019-08-20

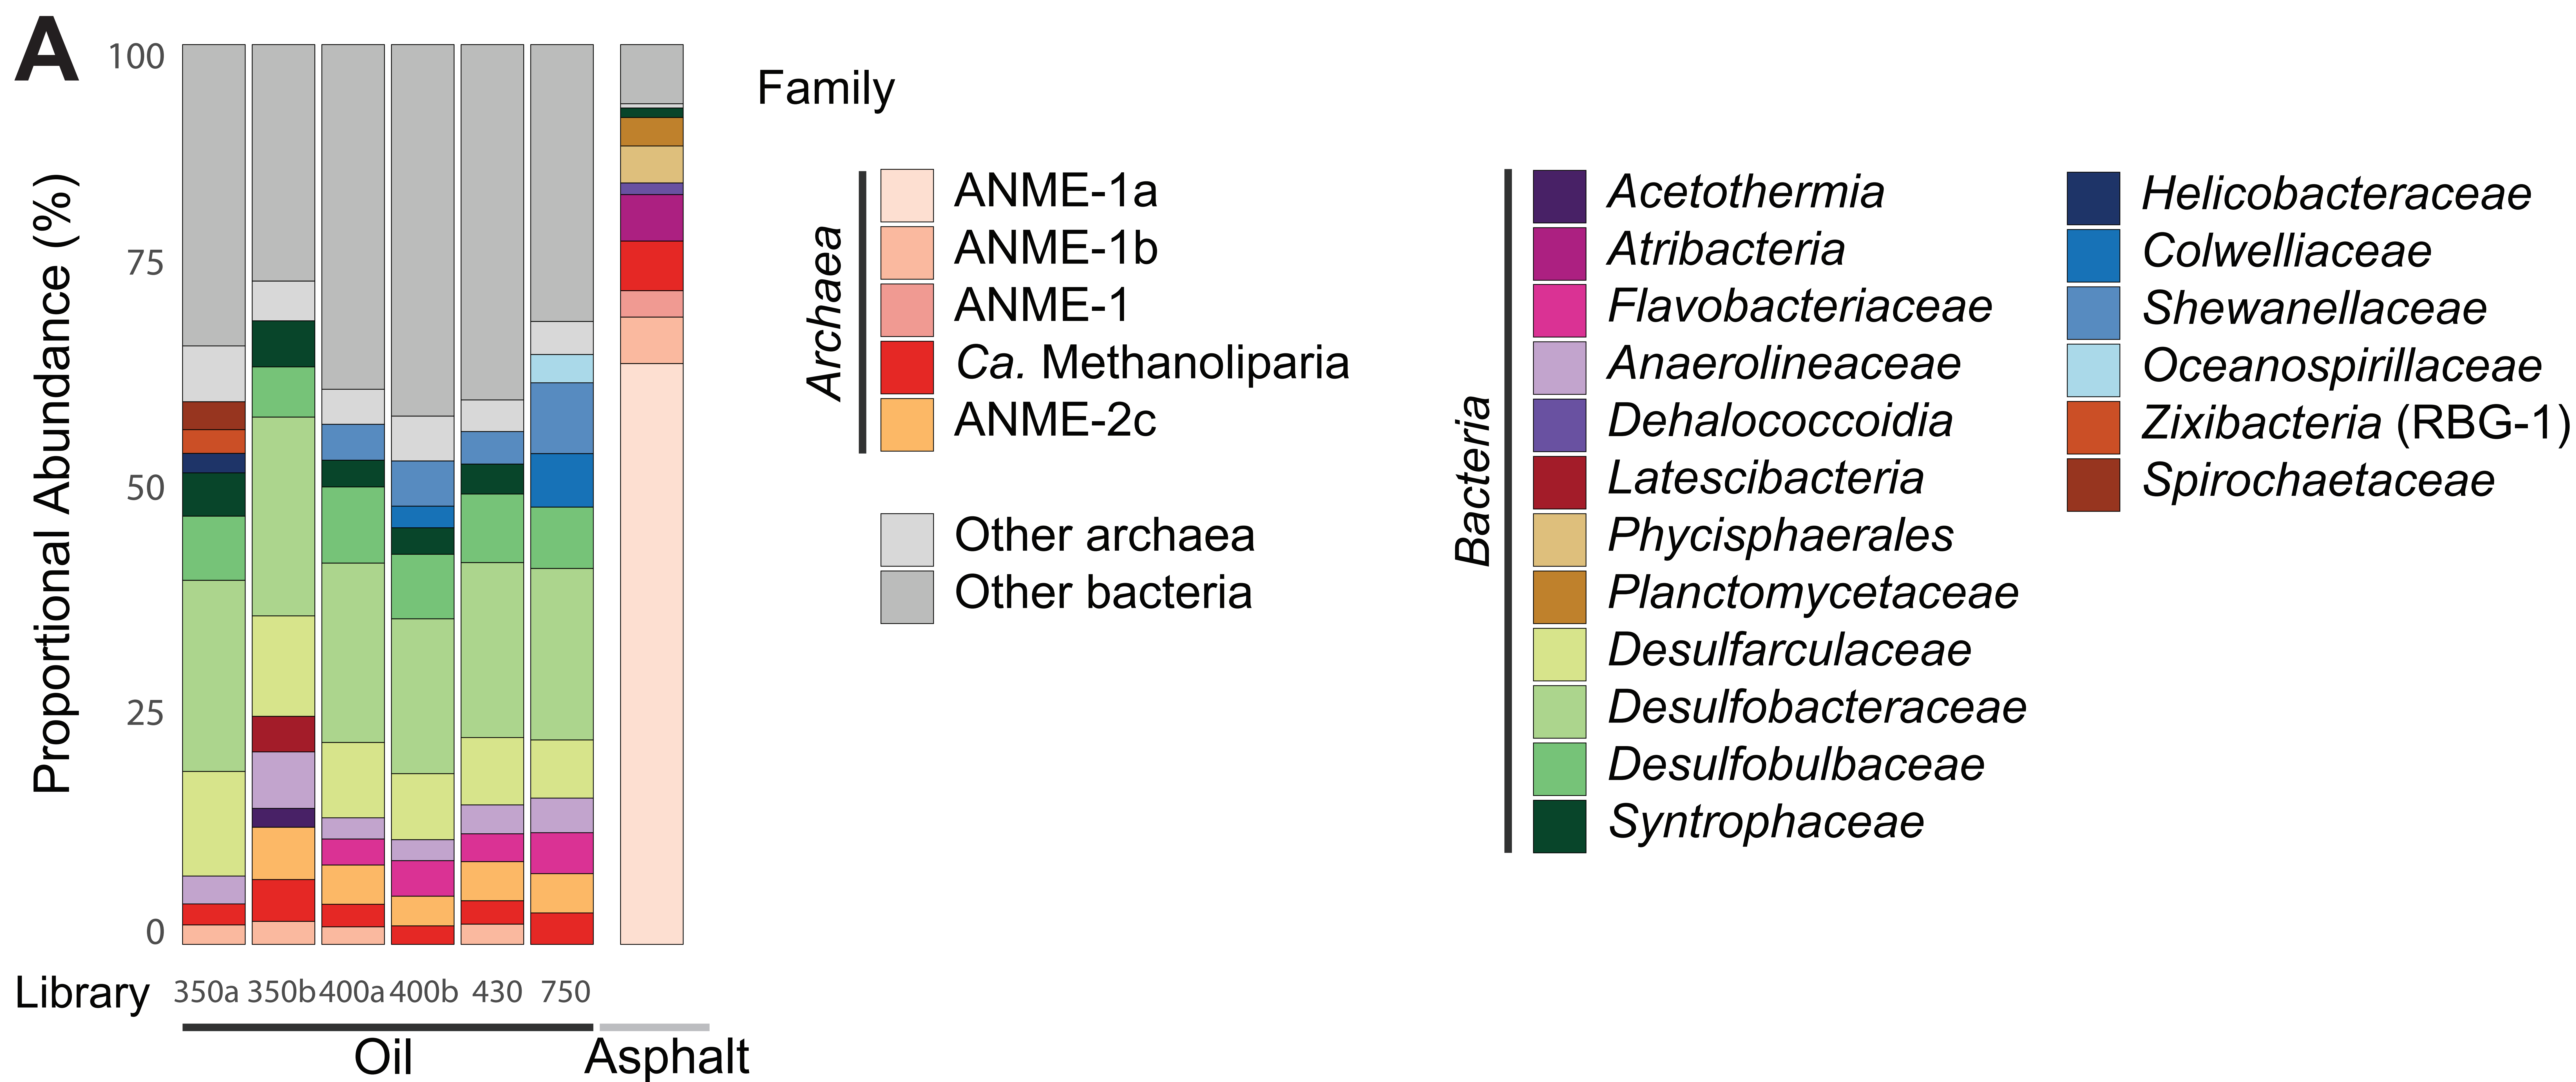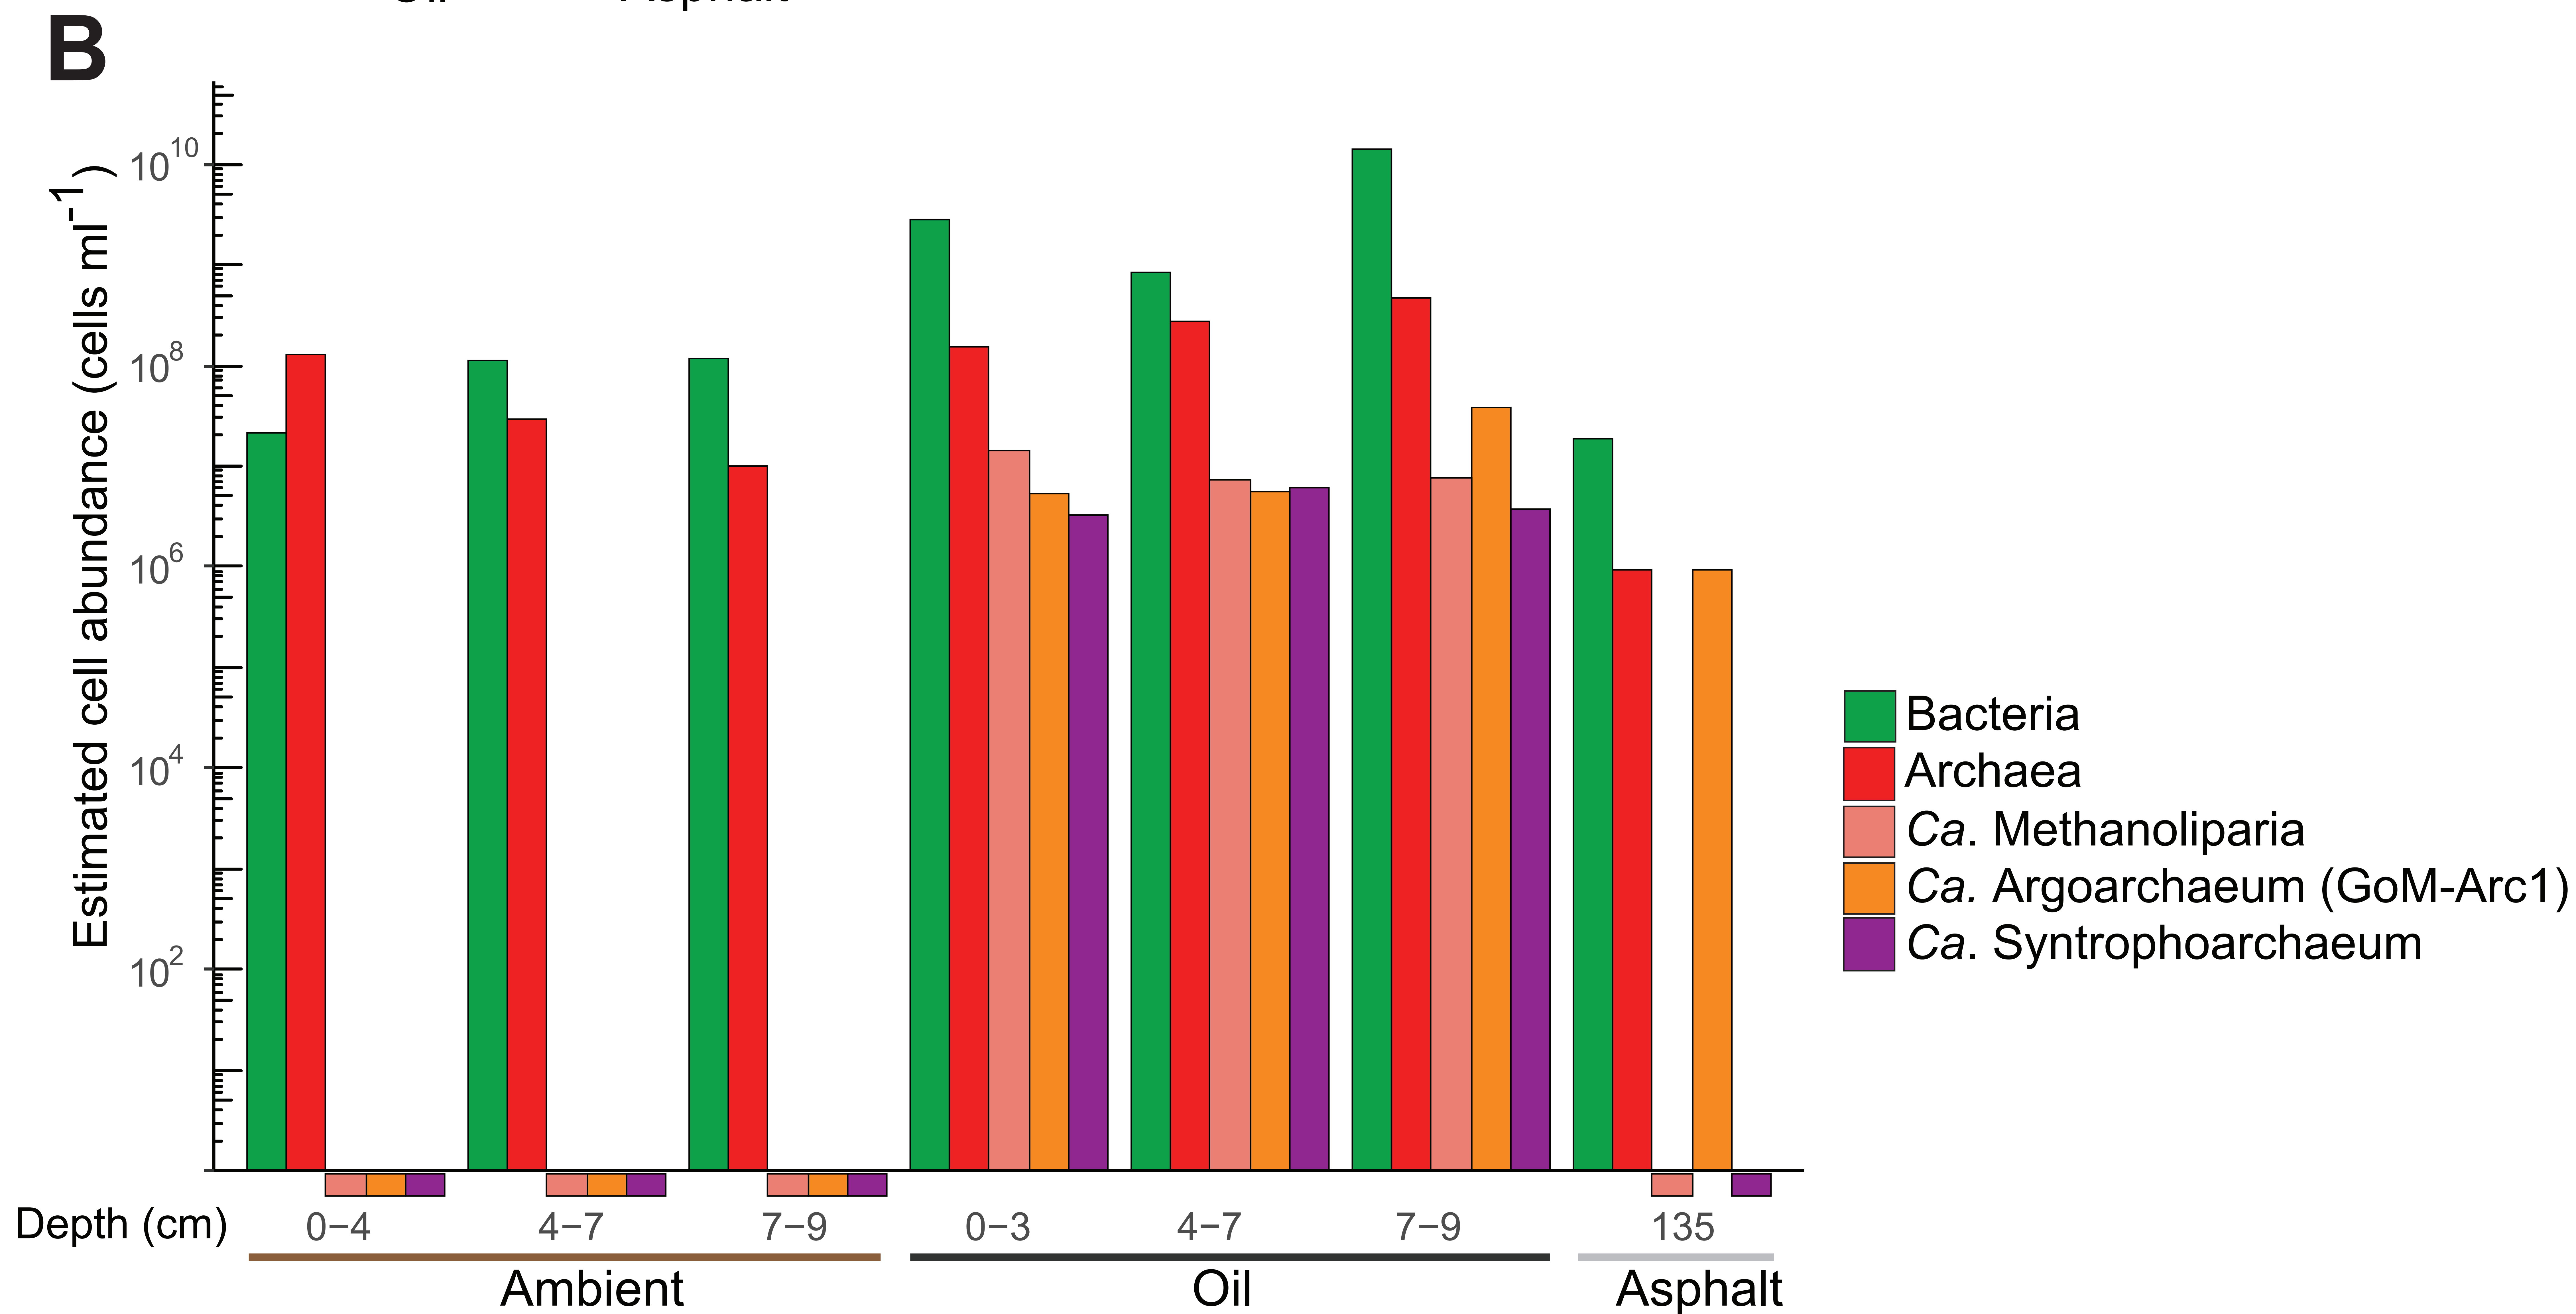

Supplement: mBio.01814-19-sf002.pdf [file mBio.01814-19-sf002.pdf]
